# Supplementary material
Source: PubMed Central journal article supplement (PMC4188070)
Supplement: f-70-01303-sup1.pdf [file f-70-01303-sup1.pdf]

# Acta Crystallographica Section F

Volume 70 (2014)

Supporting information for article:

**A Drunken Search in Crystallization Space**

**Vincent J. Fazio, Thomas S. Peat and Janet Newman**

**Table S1** The 96 most successful commercial conditions found from the NR-SCC (ordered by success)

| Rank | Frequency | Condition                                                                                                        |
|------|-----------|------------------------------------------------------------------------------------------------------------------|
| 1    | 95        | 30.000 w/v polyethylene glycol 4000 ; 0.100 M tris buffer class pH 8.5; 0.200 M magnesium chloride               |
| 2    | 85        | 2.000 M ammonium sulfate                                                                                         |
| 3    | 80        | 20.000 w/v polyethylene glycol 3350 ; 0.200 M acetate non-buffer class                                           |
| 4    | 80        | 2.000 M ammonium sulfate ; 0.100 M tris buffer class pH 8.5                                                      |
| 5    | 79        | 20.000 w/v polyethylene glycol 3350 ; 0.200 M citrate non-buffer class                                           |
| 6    | 78        | 0.100 M HEPES buffer class pH 7.5; 20.000 w/v polyethylene glycol 4000 ; 10.000 w/v 2-propanol                   |
| 7    | 77        | 2.000 w/v polyethylene glycol 400 ; 2.000 M ammonium sulfate ; 0.100 M HEPES buffer class pH 7.5                 |
| 8    | 75        | 1.400 M citrate non-buffer class ; 0.100 M HEPES buffer class pH 7.5                                             |
| 9    | 74        | 0.200 M acetate non-buffer class ; 0.100 M tris buffer class pH 8.5; 30.000 w/v polyethylene glycol 4000         |
| 10   | 64        | 0.200 M lithium sulfate ; 0.100 M tris buffer class pH 8.5; 30.000 w/v polyethylene glycol 4000                  |
| 11   | 56        | 4.000 M sodium formate                                                                                           |
| 12   | 54        | 0.200 M magnesium acetate ; 0.100 M sodium cacodylate pH 6.5; 20.000 w/v polyethylene glycol 8000                |
| 13   | 52        | 0.100 M bis-tris buffer class pH 5.5; 25.000 w/v polyethylene glycol 3350                                        |
| 14   | 50        | 0.100 M MES buffer class pH 6.5; 12.000 w/v polyethylene glycol 20000                                            |
| 15   | 50        | 0.200 M magnesium chloride ; 0.100 M bis-tris buffer class pH 5.5; 25.000 w/v polyethylene glycol 3350           |
| 16   | 49        | 30.000 w/v polyethylene glycol monomethyl ether 5000 ; 0.100 M MES buffer class pH 6.5; 0.200 M ammonium sulfate |

|    |    |                                                                                                          |
|----|----|----------------------------------------------------------------------------------------------------------|
| 17 | 46 | 20.000 w/v polyethylene glycol 3350 ; 0.200 M calcium chloride                                           |
| 18 | 43 | 0.100 M HEPES buffer class pH 7.5; 20.000 w/v polyethylene glycol 10000                                  |
| 19 | 43 | 20.000 w/v polyethylene glycol 3350 ; 0.200 M sodium formate                                             |
| 20 | 43 | 0.200 M ammonium sulfate ; 0.100 M bis-tris buffer class pH 5.5; 25.000 w/v polyethylene glycol 3350     |
| 21 | 43 | 1.600 M citrate non-buffer class                                                                         |
| 22 | 42 | 0.100 M HEPES buffer class pH 7.5; 0.200 M calcium chloride ; 28.000 w/v polyethylene glycol 400         |
| 23 | 42 | 20.000 w/v polyethylene glycol 3350 ; 0.200 M ammonium chloride                                          |
| 24 | 42 | 0.200 M magnesium formate ; 20.000 w/v polyethylene glycol 3350                                          |
| 25 | 42 | 0.200 M ammonium sulfate ; 25.000 w/v polyethylene glycol 4000 ; 0.100 M acetate buffer class pH 4.6     |
| 26 | 41 | 2.400 M malonate non-buffer class                                                                        |
| 27 | 41 | 0.200 M lithium sulfate ; 0.100 M bis-tris buffer class pH 5.5; 25.000 w/v polyethylene glycol 3350      |
| 28 | 41 | 0.200 M potassium sodium tartrate ; 20.000 w/v polyethylene glycol 3350                                  |
| 29 | 40 | 0.200 M ammonium sulfate ; 0.100 M sodium cacodylate pH 6.5; 30.000 w/v polyethylene glycol 8000         |
| 30 | 40 | 0.100 M acetate buffer class pH 4.6; 2.000 M ammonium sulfate                                            |
| 31 | 40 | 0.100 M HEPES buffer class pH 7.5; 25.000 w/v polyethylene glycol 3350                                   |
| 32 | 39 | 0.200 M magnesium chloride ; 0.100 M bis-tris buffer class pH 6.5; 25.000 w/v polyethylene glycol 3350   |
| 33 | 39 | 0.200 M magnesium chloride ; 0.100 M tris buffer class pH 8.5; 25.000 w/v polyethylene glycol 3350       |
| 34 | 39 | 25.000 w/v polyethylene glycol 3350 ; 0.100 M HEPES buffer class pH 7.5; 0.200 M magnesium chloride      |
| 35 | 38 | 0.200 M acetate non-buffer class ; 0.100 M sodium cacodylate pH 6.5; 30.000 w/v polyethylene glycol 8000 |
| 36 | 37 | 0.200 M acetate non-buffer class ; 0.100 M bis-tris buffer class pH 5.5; 25.000 w/v                      |

|    |    |                                                                                                                      |
|----|----|----------------------------------------------------------------------------------------------------------------------|
|    |    | polyethylene glycol 3350                                                                                             |
| 37 | 36 | 1.500 M lithium sulfate ; 0.100 M HEPES buffer class pH 7.5                                                          |
| 38 | 34 | 0.100 M citrate buffer class pH 5.5; 20.000 w/v polyethylene glycol 3000                                             |
| 39 | 34 | 25.000 w/v polyethylene glycol 1500                                                                                  |
| 40 | 34 | 0.200 M potassium thiocyanate ; 20.000 w/v polyethylene glycol 3350                                                  |
| 41 | 33 | 0.200 M acetate non-buffer class ; 0.100 M sodium cacodylate pH 6.5; 18.000 w/v polyethylene glycol 8000             |
| 42 | 33 | 0.200 M lithium sulfate ; 25.000 w/v polyethylene glycol 3350 ; 0.100 M HEPES buffer class pH 7.5                    |
| 43 | 33 | 0.200 M ammonium sulfate ; 30.000 w/v polyethylene glycol 8000                                                       |
| 44 | 33 | 20.000 w/v polyethylene glycol monomethyl ether 5000 ; 0.100 M bis-tris buffer class pH 6.5                          |
| 45 | 32 | 0.200 M ammonium sulfate ; 0.100 M acetate buffer class pH 4.6; 30.000 w/v polyethylene glycol monomethyl ether 2000 |
| 46 | 32 | 0.100 M bis-tris buffer class pH 6.5; 0.200 M lithium sulfate ; 25.000 w/v polyethylene glycol 3350                  |
| 47 | 32 | 8.000 w/v polyethylene glycol 4000 ; 0.100 M acetate buffer class pH 4.6                                             |
| 48 | 32 | 2.000 M ammonium sulfate ; 0.100 M bis-tris buffer class pH 6.5                                                      |
| 49 | 32 | 2.000 M ammonium sulfate ; 0.100 M bis-tris buffer class pH 5.5                                                      |
| 50 | 32 | 25.000 w/v polyethylene glycol 3350                                                                                  |
| 51 | 30 | 0.200 M magnesium chloride ; 0.100 M HEPES buffer class pH 7.5; 30.000 w/v polyethylene glycol 400                   |
| 52 | 30 | 2.000 M ammonium sulfate ; 0.100 M HEPES buffer class pH 7.5                                                         |
| 53 | 30 | 3.500 M sodium formate                                                                                               |
| 54 | 29 | 1.600 M magnesium sulfate ; 0.100 M MES buffer class pH 6.5                                                          |
| 55 | 29 | 20.000 w/v polyethylene glycol 3350 ; 0.200 M magnesium chloride                                                     |
| 56 | 29 | 0.200 M ammonium sulfate ; 30.000 w/v polyethylene glycol 4000                                                       |
| 57 | 29 | 0.100 M potassium thiocyanate ; 30.000 w/v polyethylene glycol monomethyl ether 2000                                 |

|    |    |                                                                                                             |
|----|----|-------------------------------------------------------------------------------------------------------------|
| 58 | 29 | 0.200 M malonate non-buffer class ; 20.000 w/v polyethylene glycol 3350                                     |
| 59 | 29 | 0.100 M acetate buffer class pH 4.6; 2.000 M sodium formate                                                 |
| 60 | 29 | 0.200 M ammonium sulfate ; 25.000 w/v polyethylene glycol 3350 ; 0.100 M HEPES buffer class pH 7.5          |
| 61 | 29 | 0.200 M potassium sodium tartrate ; 0.100 M citrate buffer class pH 5.6; 2.000 M ammonium sulfate           |
| 62 | 28 | 0.100 M HEPES buffer class pH 7.5; 0.200 M acetate non-buffer class ; 25.000 w/v polyethylene glycol 3350   |
| 63 | 28 | 0.200 M ammonium sulfate ; 20.000 w/v polyethylene glycol 3350                                              |
| 64 | 28 | 1.000 M citrate non-buffer class ; 0.100 M sodium cacodylate pH 6.5                                         |
| 65 | 28 | 0.200 M ammonium sulfate ; 0.100 M bis-tris buffer class pH 6.5; 25.000 w/v polyethylene glycol 3350        |
| 66 | 28 | 20.000 w/v polyethylene glycol 3350 ; 0.200 M ammonium nitrate                                              |
| 67 | 28 | 20.000 w/v polyethylene glycol 3350 ; 0.200 M sodium thiocyanate                                            |
| 68 | 27 | 0.200 M potassium nitrate pH 6.9; 20.000 w/v polyethylene glycol 3350                                       |
| 69 | 27 | 0.100 M HEPES buffer class pH 7.5; 20.000 w/v polyethylene glycol 8000                                      |
| 70 | 27 | 0.200 M magnesium acetate ; 20.000 w/v polyethylene glycol 3350                                             |
| 71 | 27 | 0.100 M bis-tris buffer class pH 6.5; 25.000 w/v polyethylene glycol 3350                                   |
| 72 | 26 | 30.000 w/v 2-methyl-2,4-pentanediol ; 0.100 M acetate buffer class pH 4.6; 0.020 M calcium chloride         |
| 73 | 25 | 0.200 M acetate non-buffer class ; 0.100 M MES buffer class pH 6.0; 20.000 w/v polyethylene glycol 8000     |
| 74 | 25 | 20.000 w/v polyethylene glycol 3350 ; 0.200 M sodium sulfate                                                |
| 75 | 25 | 25.000 w/v polyethylene glycol monomethyl ether 550 ; 0.100 M MES buffer class pH 6.5; 0.010 M zinc sulfate |
| 76 | 25 | 0.200 M disodium tartrate ; 20.000 w/v polyethylene glycol 3350                                             |
| 77 | 24 | 60.000 w/v tacsimate pH 7.0                                                                                 |
| 78 | 24 | 0.500 M ammonium sulfate ; 0.100 M citrate buffer class pH 5.6; 1.000 M lithium sulfate                     |

|    |    |                                                                                                               |
|----|----|---------------------------------------------------------------------------------------------------------------|
| 79 | 24 | 30.000 w/v polyethylene glycol 1500                                                                           |
| 80 | 24 | 0.200 M magnesium chloride ; 0.100 M tris buffer class pH 8.5; 20.000 w/v polyethylene glycol 8000            |
| 81 | 24 | 20.000 w/v polyethylene glycol 3350 ; 0.200 M diammonium tartrate                                             |
| 82 | 24 | 0.2000 M sodium fluoride ; 20.000 w/v polyethylene glycol 3350                                                |
| 83 | 23 | 0.200 M sodium chloride ; 2.000 M ammonium sulfate ; 0.100 M sodium cacodylate pH 6.5                         |
| 84 | 23 | 0.100 M sodium chloride ; 0.100 M HEPES buffer class pH 7.5; 1.600 M ammonium sulfate                         |
| 85 | 23 | 0.200 M ammonium formate ; 20.000 w/v polyethylene glycol 3350                                                |
| 86 | 23 | 20.000 w/v polyethylene glycol 3350 ; 0.200 M trilitium citrate                                               |
| 87 | 22 | 0.200 M ammonium iodide ; 20.000 w/v polyethylene glycol 3350                                                 |
| 88 | 22 | 0.200 M acetate non-buffer class ; 0.100 M bis-tris buffer class pH 6.5; 25.000 w/v polyethylene glycol 3350  |
| 89 | 21 | 30.000 w/v polyethylene glycol 4000                                                                           |
| 90 | 21 | 0.100 M tris buffer class pH 8.5; 25.000 w/v polyethylene glycol 3350                                         |
| 91 | 21 | 20.000 w/v polyethylene glycol 3350 ; 0.200 M ammonium fluoride                                               |
| 92 | 21 | 0.100 M acetate non-buffer class ; 0.100 M bis-tris buffer class pH 5.5; 17.000 w/v polyethylene glycol 10000 |
| 93 | 21 | 0.200 M acetate non-buffer class ; 0.100 M imidazole pH 8.0; 10.000 w/v polyethylene glycol 8000              |
| 94 | 21 | 0.200 M ammonium sulfate ; 25.000 w/v polyethylene glycol 3350 ; 0.100 M tris buffer class pH 8.5             |
| 95 | 21 | 20.000 w/v polyethylene glycol 8000 ; 0.100 M CHES non-buffer class                                           |
| 96 | 20 | 0.100 M HEPES buffer class pH 7.5; 4.300 M sodium chloride                                                    |
